# Supplementary material
Source: Elsevier journal article supplement (https://www.sciencedirect.com/science/article/pii/S0300289618303296)
Supplement: mmc1 [file S0300289618303296:mmc1.pdf]

## Proyecto: Biomarcadores y perfiles clínicos personalizados en la EPOC (BIOMEPOC)

### ADDENDUM 1

### Procesamiento de las Muestras Sanguíneas

Se extraerán 50 ml de sangre en cada paciente por punción de la vena basilar, cuidando evitar cualquier contacto con la piel para evitar la contaminación del RNA. Dicha sangre se fraccionará en 4 porciones (ver figura al final del documento):

- 1) 5 ml en un tubo para análisis del **hemograma**
- 2) 20 ml para obtención de **plasma** (resultante, unos 10 ml)
- 3) 10 ml para obtención de **suero** (resultante, unos 5-6 ml)
- 4) 10 ml de sangre total, sin procesamiento adicional, para análisis de **RNA**

Hay un margen de 5 ml hasta sumar los 50 ml extraídos

Tubos de **Hemograma y de Plasma** (se trata del tubo de tapón morado-lavanda, BD Vacutainer EDTA K2, ref. 368861). Tras la extracción, la sangre se colocará en los tres tubos (5 ml en el tubo del hemograma y 10 ml en cada uno de los dos tubos que servirán para la obtención de plasma). Los tubos se agitarán suavemente (giro manual) por 1 minuto.

El análisis del **hemograma** se realizará en el laboratorio del centro extractor (como servicio concertado), en las 3 horas siguientes a la extracción.

**Preparación del Plasma** (mayoría de biomarcadores por técnicas convencionales, proteómica y metabolómica)

*Los 20 ml destinados a la obtención de plasma estarán divididos en 2 tubos de 10 ml cada uno. Dichos tubos se centrifugarán a 1500g por 15 minutos. Se obtendrán así 5 ml de plasma por cada tubo (10 ml en total).*

*A continuación se tomará el plasma con una pipeta (cuidando de no mezclarlo con la fase celular) y se alicuotará en 8-10 crioviales de 0,5 ml. Se rotulará y congelará inmediatamente a -80° C hasta su procesamiento definitivo.*

**Preparación del Suero** (determinaciones bioquímicas y alguna de las técnicas convencionales)

*Los 10 ml destinados a la obtención de suero se colocarán en un tubo de bioquímica de dicha capacidad (tapón rojo, BD 366468, Bioquímica SST II, con gel separador). Éste se agitará a continuación con suavidad y se dejará reposar por 30 minutos a temperatura ambiente. Se centrifugará entonces a 1500 g por 15 minutos más, y se separarán las fases (suero, zona intermedia gelatinosa y fase celular). Finalmente, el suero (5-6 ml aproximadamente), obtenido con una pipeta y cuidando de no mezclarlo con las otras fases, se colocará en 4-5 crioviales, que inmediatamente se rotularán y congelarán a -80° C hasta su procesamiento.*

**Preparación para análisis del RNA**

Los 10 ml de sangre correspondientes a esta fracción se colocarán en tres tubos (Tempus Blood RNA tube, Vacuette, Applied Biosystems. P/N 4342792; L/N A1108014), que se agitarán vigorosamente o en el vórtex durante 10 segundos (esencial para la estabilización de la muestra). A continuación se rotulará y congelará a -80° C.

**IMPORTANTE NO DESCUIDAR LA ADECUADA ROTULACIÓN DE LOS TUBOS ANTES DE CONGELAR** (código del paciente y fecha de extracción)
